# Supplementary material
Source: publisher site journal article supplement (https://www.spandidos-publications.com/3158/downloadSupplementary)

Figure S1. The original images of the integral western blot gels.

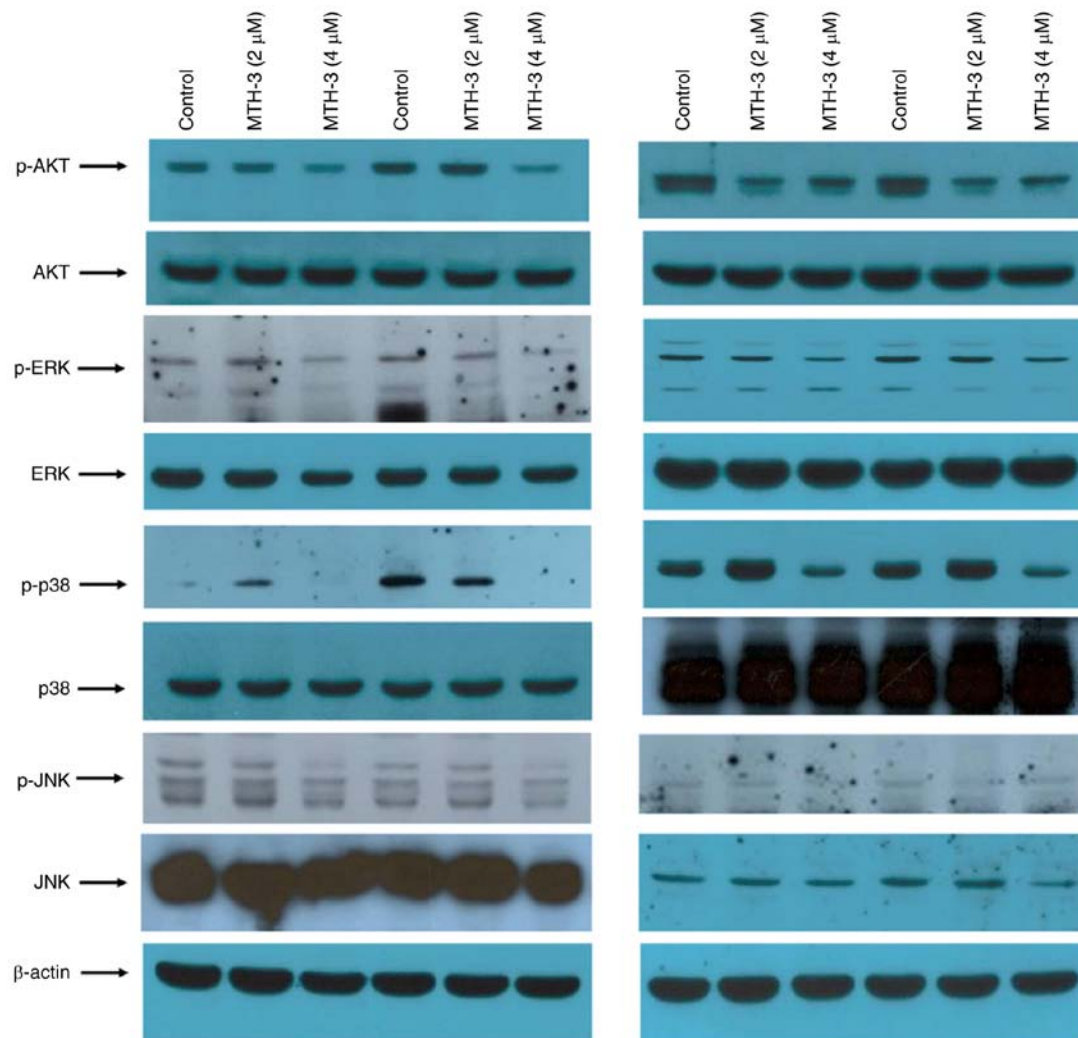

Supplement: Supplementary file 1 [file downloadSupplementary]
